# Supplementary material for: Nasopharyngeal Carcinoma Progression: Accumulating Genomic Instability and Persistent Epstein–Barr Virus Infection
Source: MDPI journal article supplement (doi:10.3390/curroncol29090475), 2022-08-23
Supplement: s1 [file s1]

# Nasopharyngeal Carcinoma Progression: Accumulating Genomic Instability and Persistent Epstein–Barr Virus Infection

Xue Liu <sup>1</sup>, Yayan Deng <sup>1</sup>, Yujuan Huang <sup>1</sup>, Jiaxiang Ye <sup>1</sup>, Sifang Xie <sup>2</sup>, Qian He <sup>3</sup>, Yong Chen <sup>1</sup>, Yan Lin <sup>1</sup>,  
Rong Liang <sup>1</sup>, JiazhangWei <sup>2</sup>, Yongqiang Li <sup>1,\*</sup> and Jinyan Zhang <sup>1,\*</sup>

<sup>1</sup> Department of Medical Oncology, Guangxi Medical University Cancer Hospital, 71 Hedi Road, Nanning 530021, China

<sup>2</sup> Department of Otolaryngology & Head and Neck, The People's Hospital of Guangxi Zhuang Autonomous Region, Guangxi Academy of Medical Sciences, 6 Taoyuan Road, Nanning 530021, China

<sup>3</sup> Institute of Biopharmaceutical and Health Engineering, Tsinghua Shenzhen International Graduate School, Tsinghua University, Shenzhen 518055, China

\* Correspondence: liyongqiang@gxmu.edu.cn (Y.L.); zhangjinyan@gxmu.edu.cn (J.Z.)

**Table S1.** The hallmarks of cancer triggered by EBV genes and their products.

| EBV genes and products | Targeted molecules | Functions of the targeted molecules                        | Key regulators/pathways                                       | The hallmarks of cancer                                                   | Ref.    |
|------------------------|--------------------|------------------------------------------------------------|---------------------------------------------------------------|---------------------------------------------------------------------------|---------|
| LMP1                   | Id1 and Id3        | Regulation of cell cycle                                   | N/A                                                           | Sustaining proliferative signaling                                        | [1]     |
|                        | Cyclin D1          | Regulation of cell cycle                                   | EGFR, TIF2, and STAT3                                         | Sustaining proliferative signaling and resisting cell death               | [2,3]   |
|                        | <i>p16</i>         | Regulation of cell cycle                                   | N/A                                                           | Sustaining proliferative signaling                                        | [4]     |
|                        | LKB1-AMPK          | Regulation of cellular metabolism                          | MEK/ERK-MAPK signaling pathway                                | Sustaining proliferative signaling and reprogramming of energy metabolism | [5]     |
|                        | TGF- $\beta$       | Regulation of cell proliferation and differentiation       | Id1                                                           | Evading growth suppressors                                                | [6]     |
|                        | <i>TP53</i>        | Repair of DNA damage and inducing apoptosis                | MAP kinases, anti-apoptotic genes <i>bcl-2</i> and <i>A20</i> | Resisting cell death                                                      | [7,8]   |
|                        | Telomerase         | Regulation of replication                                  | c-Myc pathway                                                 | Enabling replicative immortality                                          | [9]     |
|                        | HIF1               | Serving as a principal oxygen-sensing transcription factor | prolyl hydroxylase 1 and prolyl hydroxylase 3                 | Inducing angiogenesis                                                     | [10]    |
|                        | HIF-1/VEGF         | Regulation of glucose uptake, metabolism,                  | JNKs/c-Jun signaling and p42/p44 MAPK pathways                | Inducing angiogenesis                                                     | [11,12] |

|                  |                                                           |                                           |                                                                        |            |  |
|------------------|-----------------------------------------------------------|-------------------------------------------|------------------------------------------------------------------------|------------|--|
|                  | apoptosis, growth, angiogenesis, invasion, and metastasis |                                           |                                                                        |            |  |
| FGF-2            | Regulation of angiogenesis and mitosis                    | NF-κB signaling pathway                   | Inducing angiogenesis                                                  | [13]       |  |
| VEGF and PGE2    | Regulation of angiogenesis                                | COX-2                                     | Inducing angiogenesis                                                  | [14,15]    |  |
| RAGEs            | Regulation of angiogenesis                                | NF-κB signaling pathway                   | Inducing angiogenesis                                                  | [16]       |  |
| VEGF             | Regulation of apoptosis, angiogenesis, and cell migration | SOCE, JAK/STAT3, and MEK1/ERK1/2 pathways | Activating invasion and metastasis, inducing angiogenesis              | [17,18]    |  |
| Twist            | Inducing EMT                                              | NF-κB signaling pathway                   | Activating invasion and metastasis                                     | [19]       |  |
| CDH6             | Regulation of EMT                                         | miRNA-203                                 | Activating invasion and metastasis                                     | [20]       |  |
| HIF1α            | Regulation of angiogenesis, invasion, and metastasis      | Exosome-mediated signaling                | Activating invasion and metastasis                                     | [21]       |  |
| CRT              | Maintaining intracellular Ca <sup>2+</sup> homeostasis    | Smad3-dependent TGF-β signaling pathway   | Activating invasion and metastasis                                     | [22]       |  |
| E-cadherin       | Maintenance of intercellular adhesion                     | DNA methyltransferases                    | Activating invasion and metastasis                                     | [23]       |  |
| Snail            | Regulation of EMT by repressing E-cadherin                | IGF1-mTORC2-PDHE1α signaling pathway      | Activating invasion and metastasis, reprogramming of energy metabolism | [24,25]    |  |
| uPA              | Degrading extracellular matrix components                 | Ets1                                      | Activating invasion and metastasis                                     | [26]       |  |
| MMP-1            | Promotion of invasion by breaking ECMs                    | Ets                                       | Activating invasion and metastasis                                     | [27]       |  |
| MMP-9            | Promotion of invasion by breaking ECMs                    | c-Jun/Ets1, NF-κB, and AP-1               | Activating invasion and metastasis                                     | [15,28-30] |  |
| OXPHOS complexes | Oxidative phosphorylation                                 | DNMTs                                     | Reprogramming of energy metabolism                                     | [31]       |  |
| Glut-1           | Regulation of aerobic glycolysis                          | mTORC1/NF-κB signaling pathway            | Reprogramming of energy metabolism                                     | [32]       |  |
| HK2              | Modulation of LMP1-induced glycolysis                     | c-Myc                                     | Reprogramming of energy metabolism and resisting cell death            | [33]       |  |

|                   |                                 |                                                                                  |                                                                  |                                                             |         |
|-------------------|---------------------------------|----------------------------------------------------------------------------------|------------------------------------------------------------------|-------------------------------------------------------------|---------|
| LMP2A             | Th1 lymphocytes                 | Modulation of immune response                                                    | galectin-9/Tim-3                                                 | Evading immune destruction                                  | [34]    |
|                   | VEGF                            | Regulation of angiogenesis                                                       | PI3K/Akt/mTOR/HIF-1 $\alpha$ pathway                             | Inducing angiogenesis                                       | [35]    |
|                   | ITG $\alpha$ 6                  | Maintenance of epithelial structure                                              | N/A                                                              | Activating invasion and metastasis                          | [36]    |
|                   | $\alpha$ v-integrin             | Regulation of cell migration                                                     | ITAM/Syk and Akt signaling pathways                              | Activating invasion and metastasis                          | [37]    |
|                   | Transcription factor <i>p63</i> | Regulation of epithelial cell differentiation                                    | N/A                                                              | Sustaining proliferative signaling                          | [38]    |
|                   | S1P                             | Regulation of proliferation, survival, migration, apoptosis, and chemoresistance | SPHK1                                                            | Activating invasion and metastasis                          | [39]    |
|                   | TGF- $\beta$ 1                  | Regulation of cell growth and differentiation                                    | PI3K/Akt pathway                                                 | Sustaining proliferative signaling and resisting cell death | [40]    |
| EBNA1             | E-cadherin and N-cadherin       | Regulation of EMT                                                                | TGF- $\beta$ 1/miR-200/ZEB pathway                               | Activating invasion and metastasis                          | [41]    |
|                   | p53-Mdm2                        | Regulation of apoptosis                                                          | USP7/HAUSP                                                       | Sustaining proliferative signaling and resisting cell death | [42]    |
|                   | Survivin                        | Regulation of apoptosis and cell cycle                                           | Sp1                                                              | Resisting cell death                                        | [43]    |
| EBV-miR-BART1     | PTEN                            | Regulation of cell growth and survival                                           | PI3K/Akt, FAK-p130 <sup>Cas</sup> , and Shc-MAPK/ERK1/2 pathways | Activating invasion and metastasis                          | [44,45] |
| EBV-miR-BART5     | PUMA                            | Promotion of apoptosis                                                           | N/A                                                              | Resisting cell death                                        | [46]    |
| EBV-miR-BART6-3p  | IFN- $\beta$                    | Modulation of immune response                                                    | RIG-I mRNA 22 and RIG-I-like receptor                            | Evading immune destruction                                  | [44]    |
| EBV-miR-BART7     | MICA                            | Modulation of immune response                                                    | TGF $\beta$ 1/c-Myc                                              | Evading immune destruction                                  | [47]    |
| EBV-miR-BART7-3p  | Snail and $\beta$ -catenin      | Regulation of EMT                                                                | PI3K/Akt/GSK-3 $\beta$ pathway                                   | Activating invasion and metastasis                          | [44]    |
| EBV-miR-BART10-3p | $\beta$ -catenin and Snail      | Regulation of EMT                                                                | BTRC                                                             | Activating invasion and metastasis                          | [44]    |
| EBV-miR-BART11    | NF- $\kappa$ B and TAM          | Regulation of proliferation                                                      | FOXP1                                                            | Sustaining proliferative signaling                          | [48]    |
| EBV-miR-BART13-3p | Slug                            | Regulation of EMT by repressing E-cadherin                                       | c-Jun/Slug signaling pathway                                     | Activating invasion and metastasis                          | [49]    |

**Abbreviations:** Id1, Id proteins 1; Id3, Id proteins 3; EGFR, epidermal growth factor receptor; TIF2, transcriptional intermediary factor 2; STAT3, signal transducer and activator of transcription 3; TGF- $\beta$ , transforming growth factor beta; HIF1, hypoxia-inducible factor 1; VEGF, vascular endothelial growth factor; FGF-2, fibroblast growth factor 2; PGE2, prostaglandin E2; COX-2,

cyclooxygenase-2; RAGEs, the receptor for advanced glycation end products; SOCE, store-operated Ca(2+) entry; EMT, epithelial-mesenchymal transition; CDH6, cadherin 6; CRT, calreticulin; uPA, urokinase type plasminogen activator; Ets, E26 transformation specific; MMP, matrix metalloproteinase; OXPHOS, oxidative phosphorylation; Glut-1, Glucose Transporter 1; ECM, extracellular matrix; DNMTs, DNA methyltransferases; HK2, hexokinase 2; ITGα6, integrin-α-6; PI3K, Phosphatidylinositol 3-kinase; S1P, sphingosine-1-Phosphate; ZEB1, zinc finger E-box binding homeobox 1; USP7, ubiquitin specific protease 7; HAUSP, herpesvirus-associated ubiquitin-specific protease; Sp1, specificity protein 1; MICA, major histocompatibility complex class I chain-related peptide A; TGFβ1, transforming growth factor-β; BTRC, Beta-transducin repeat containing E3 ubiquitin protein ligase; TAM, tumor-associated macrophages; FOXp1, forkhead box P1; N/A, not available.

## References

1. Everly, D.N., Jr.; Mainou, B.A.; Raab-Traub, N. The ID proteins contribute to the growth of rodent fibroblasts during LMP1-mediated transformation. *Virology* **2008**, *376*, 258–269, doi:10.1016/j.virol.2007.12.003.
2. Shi, Y.; Tao, Y.; Jiang, Y.; Xu, Y.; Yan, B.; Chen, X.; Xiao, L.; Cao, Y. Nuclear epidermal growth factor receptor interacts with transcriptional intermediary factor 2 to activate cyclin D1 gene expression triggered by the oncoprotein latent membrane protein 1. *Carcinogenesis* **2012**, *33*, 1468–1478, doi:10.1093/carcin/bgs171.
3. Xu, Y.; Shi, Y.; Yuan, Q.; Liu, X.; Yan, B.; Chen, L.; Tao, Y.; Cao, Y. Epstein-Barr Virus encoded LMP1 regulates cyclin D1 promoter activity by nuclear EGFR and STAT3 in CNE1 cells. *J Exp Clin Cancer Res* **2013**, *32*, 90, doi:10.1186/1756-9966-32-90.
4. Yang, X.; He, Z.; Xin, B.; Cao, L. LMP1 of Epstein-Barr virus suppresses cellular senescence associated with the inhibition of p16INK4a expression. *Oncogene* **2000**, *19*, 2002–2013, doi:10.1038/sj.onc.1203515.
5. Lo, A.K.; Lo, K.W.; Ko, C.W.; Young, L.S.; Dawson, C.W. Inhibition of the LKB1-AMPK pathway by the Epstein-Barr virus-encoded LMP1 promotes proliferation and transformation of human nasopharyngeal epithelial cells. *J Pathol* **2013**, *230*, 336–346, doi:10.1002/path.4201.
6. Lo, A.K.; Dawson, C.W.; Lo, K.W.; Yu, Y.; Young, L.S. Upregulation of Id1 by Epstein-Barr virus-encoded LMP1 confers resistance to TGFβ-mediated growth inhibition. *Mol Cancer* **2010**, *9*, 155, doi:10.1186/1476-4598-9-155.
7. Li, L.; Guo, L.; Tao, Y.; Zhou, S.; Wang, Z.; Luo, W.; Hu, D.; Li, Z.; Xiao, L.; Tang, M.; et al. Latent membrane protein 1 of Epstein-Barr virus regulates p53 phosphorylation through MAP kinases. *Cancer Lett* **2007**, *255*, 219–231, doi:10.1016/j.canlet.2007.04.014.
8. Fries, K.L.; Miller, W.E.; Raab-Traub, N. Epstein-Barr virus latent membrane protein 1 blocks p53-mediated apoptosis through the induction of the A20 gene. *J Virol* **1996**, *70*, 8653–8659, doi:10.1128/JVI.70.12.8653-8659.1996.
9. Yang, J.; Deng, X.; Deng, L.; Gu, H.; Fan, W.; Cao, Y. Telomerase activation by Epstein-Barr virus latent membrane protein 1 is associated with c-Myc expression in human nasopharyngeal epithelial cells. *J. Exp. Clin. Cancer Res.* **2004**, *23*, 495–506.
10. Kondo, S.; Seo, S.Y.; Yoshizaki, T.; Wakisaka, N.; Furukawa, M.; Joab, I.; Jang, K.L.; Pagano, J.S. EBV latent membrane protein 1 up-regulates hypoxia-inducible factor 1α through Siah1-mediated down-regulation of prolyl hydroxylases 1 and 3 in nasopharyngeal epithelial cells. *Cancer Res* **2006**, *66*, 9870–9877, doi:10.1158/0008-5472.CAN-06-1679.
11. Yang, L.; Liu, L.; Xu, Z.; Liao, W.; Feng, D.; Dong, X.; Xu, S.; Xiao, L.; Lu, J.; Luo, X.; et al. EBV-LMP1 targeted DNase enhances radiosensitivity by inhibiting tumor angiogenesis via the JNKs/HIF-1 pathway in nasopharyngeal carcinoma. *Oncotarget* **2015**, *6*, 5804–5817, doi:10.18632/oncotarget.3331.
12. Wakisaka, N.; Kondo, S.; Yoshizaki, T.; Muro, S.; Furukawa, M.; Pagano, J.S. Epstein-Barr virus latent membrane protein 1 induces synthesis of hypoxia-inducible factor 1 α. *Mol Cell Biol* **2004**, *24*, 5223–5234, doi:10.1128/MCB.24.12.5223-5234.2004.
13. Wakisaka, N.; Muro, S.; Yoshizaki, T.; Furukawa, M.; Pagano, J.S. Epstein-barr virus latent membrane protein 1 induces and causes release of fibroblast growth factor-2. *Cancer Res* **2002**, *62*, 6337–6344.
14. Muro, S.; Inoue, H.; Tanabe, T.; Joab, I.; Yoshizaki, T.; Furukawa, M.; Pagano, J.S. Induction of cyclooxygenase-2 by Epstein-Barr virus latent membrane protein 1 is involved in vascular endothelial growth factor production in nasopharyngeal carcinoma cells. *Proc Natl Acad Sci U S A* **2001**, *98*, 6905–6910, doi:10.1073/pnas.121016998.
15. Yoshizaki, T. Promotion of metastasis in nasopharyngeal carcinoma by Epstein-Barr virus latent membrane protein-1. *Histol Histopathol* **2002**, *17*, 845–850, doi:10.14670/HH-17.845.
16. Tsuji, A.; Wakisaka, N.; Kondo, S.; Muro, S.; Furukawa, M.; Yoshizaki, T. Induction of receptor for advanced glycation end products by EBV latent membrane protein 1 and its correlation with angiogenesis and cervical lymph node metastasis in nasopharyngeal carcinoma. *Clin Cancer Res* **2008**, *14*, 5368–5375, doi:10.1158/1078-0432.CCR-08-0198.

17. Wei, J.; Zhang, J.; Si, Y.; Kanada, M.; Zhang, Z.; Terakawa, S.; Watanabe, H. Blockage of LMP1-modulated store-operated Ca(2+) entry reduces metastatic potential in nasopharyngeal carcinoma cell. *Cancer Lett* **2015**, *360*, 234–244, doi:10.1016/j.canlet.2015.02.032.
18. Wang, Z.; Luo, F.; Li, L.; Yang, L.; Hu, D.; Ma, X.; Lu, Z.; Sun, L.; Cao, Y. STAT3 activation induced by Epstein-Barr virus latent membrane protein1 causes vascular endothelial growth factor expression and cellular invasiveness via JAK3 And ERK signaling. *Eur J Cancer* **2010**, *46*, 2996–3006, doi:10.1016/j.ejca.2010.07.008.
19. Horikawa, T.; Yang, J.; Kondo, S.; Yoshizaki, T.; Joab, I.; Furukawa, M.; Pagano, J.S. Twist and epithelial-mesenchymal transition are induced by the EBV oncoprotein latent membrane protein 1 and are associated with metastatic nasopharyngeal carcinoma. *Cancer Res* **2007**, *67*, 1970–1978, doi:10.1158/0008-5472.CAN-06-3933.
20. Zuo, L.L.; Zhang, J.; Liu, L.Z.; Zhou, Q.; Du, S.J.; Xin, S.Y.; Ning, Z.P.; Yang, J.; Yu, H.B.; Yue, W.X.; et al. Cadherin 6 is activated by Epstein-Barr virus LMP1 to mediate EMT and metastasis as an interplay node of multiple pathways in nasopharyngeal carcinoma. *Oncogenesis* **2017**, *6*, 402, doi:10.1038/s41389-017-0005-7.
21. Aga, M.; Bentz, G.L.; Raffa, S.; Torrisi, M.R.; Kondo, S.; Wakisaka, N.; Yoshizaki, T.; Pagano, J.S.; Shackelford, J. Exosomal HIF1alpha supports invasive potential of nasopharyngeal carcinoma-associated LMP1-positive exosomes. *Oncogene* **2014**, *33*, 4613–4622, doi:10.1038/onc.2014.66.
22. Ye, D.; Zhu, J.; Zhao, Q.; Ma, W.; Xiao, Y.; Xu, G.; Zhang, Z. LMP1 Up-regulates Calreticulin to Induce Epithelial-mesenchymal Transition via TGF-beta/Smad3/NRP1 Pathway in Nasopharyngeal Carcinoma Cells. *J Cancer* **2020**, *11*, 1257–1269, doi:10.7150/jca.37415.
23. Tsai, C.L.; Li, H.P.; Lu, Y.J.; Hsueh, C.; Liang, Y.; Chen, C.L.; Tsao, S.W.; Tse, K.P.; Yu, J.S.; Chang, Y.S. Activation of DNA methyltransferase 1 by EBV LMP1 Involves c-Jun NH(2)-terminal kinase signaling. *Cancer Res.* **2006**, *66*, 11668–11676. <https://doi.org/10.1158/0008-5472.CAN-06-2194>.
24. Zhang, J.; Jia, L.; Liu, T.; Yip, Y.L.; Tang, W.C.; Lin, W.; Deng, W.; Lo, K.W.; You, C.; Lung, M.L.; et al. mTORC2-mediated PDHE1alpha nuclear translocation links EBV-LMP1 reprogrammed glucose metabolism to cancer metastasis in nasopharyngeal carcinoma. *Oncogene* **2019**, *38*, 4669–4684, doi:10.1038/s41388-019-0749-y.
25. Horikawa, T.; Yoshizaki, T.; Kondo, S.; Furukawa, M.; Kaizaki, Y.; Pagano, J.S. Epstein-Barr Virus latent membrane protein 1 induces Snail and epithelial-mesenchymal transition in metastatic nasopharyngeal carcinoma. *Br J Cancer* **2011**, *104*, 1160–1167, doi:10.1038/bjc.2011.38.
26. Kim, K.R.; Yoshizaki, T.; Miyamori, H.; Hasegawa, K.; Horikawa, T.; Furukawa, M.; Harada, S.; Seiki, M.; Sato, H. Transformation of Madin-Darby canine kidney (MDCK) epithelial cells by Epstein-Barr virus latent membrane protein 1 (LMP1) induces expression of Ets1 and invasive growth. *Oncogene* **2000**, *19*, 1764–1771, doi:10.1038/sj.onc.1203502.
27. Kondo, S.; Wakisaka, N.; Schell, M.J.; Horikawa, T.; Sheen, T.S.; Sato, H.; Furukawa, M.; Pagano, J.S.; Yoshizaki, T. Epstein-Barr virus latent membrane protein 1 induces the matrix metalloproteinase-1 promoter via an Ets binding site formed by a single nucleotide polymorphism: enhanced susceptibility to nasopharyngeal carcinoma. *Int J Cancer* **2005**, *115*, 368–376, doi:10.1002/ijc.20849.
28. Zeng, L.; Liu, Y.P.; Tao, Y.G.; Ai, M.D.; Zhao, X.R.; Cao, Y. [Cross-talk between c-Jun/Ets1 involved in EB virus-encoded latent membrane protein 1 regulates expression of matrix metalloproteinase-9 in nasopharyngeal carcinoma]. *Zhonghua Zhong Liu Za Zhi* **2005**, *27*, 204–208.
29. Horikawa, T.; Yoshizaki, T.; Sheen, T.S.; Lee, S.Y.; Furukawa, M. Association of latent membrane protein 1 and matrix metalloproteinase 9 with metastasis in nasopharyngeal carcinoma. *Cancer* **2000**, *89*, 715–723, doi:10.1002/1097-0142(20000815)89:4<715::aid-cnrc1>3.0.co;2-9.
30. Himelstein, B.P.; Lee, E.J.; Sato, H.; Seiki, M.; Muschel, R.J. Transcriptional activation of the matrix metalloproteinase-9 gene in an H-ras and v-myc transformed rat embryo cell line. *Oncogene* **1997**, *14*, 1995–1998, doi:10.1038/sj.onc.1201012.
31. Luo, X.; Hong, L.; Cheng, C.; Li, N.; Zhao, X.; Shi, F.; Liu, J.; Fan, J.; Zhou, J.; Bode, A.M.; et al. DNMT1 mediates metabolic reprogramming induced by Epstein-Barr virus latent membrane protein 1 and reversed by grifolin in nasopharyngeal carcinoma. *Cell Death Dis* **2018**, *9*, 619, doi:10.1038/s41419-018-0662-2.
32. Zhang, J.; Jia, L.; Lin, W.; Yip, Y.L.; Lo, K.W.; Lau, V.M.Y.; Zhu, D.; Tsang, C.M.; Zhou, Y.; Deng, W.; et al. Epstein-Barr Virus-Encoded Latent Membrane Protein 1 Upregulates Glucose Transporter 1 Transcription via the mTORC1/NF-kappaB Signaling Pathways. *J Virol* **2017**, *91*, doi:10.1128/JVI.02168-16.
33. Xiao, L.; Hu, Z.Y.; Dong, X.; Tan, Z.; Li, W.; Tang, M.; Chen, L.; Yang, L.; Tao, Y.; Jiang, Y.; et al. Targeting Epstein-Barr virus oncoprotein LMP1-mediated glycolysis sensitizes nasopharyngeal carcinoma to radiation therapy. *Oncogene* **2014**, *33*, 4568–4578, doi:10.1038/onc.2014.32.

34. Klibi, J.; Niki, T.; Riedel, A.; Pioche-Durieu, C.; Souquere, S.; Rubinstein, E.; Le Moulec, S.; Guigay, J.; Hirashima, M.; Guemira, F.; et al. Blood diffusion and Th1-suppressive effects of galectin-9-containing exosomes released by Epstein-Barr virus-infected nasopharyngeal carcinoma cells. *Blood* **2009**, *113*, 1957–1966, doi:10.1182/blood-2008-02-142596.
35. Xiang, T.; Lin, Y.X.; Ma, W.; Zhang, H.J.; Chen, K.M.; He, G.P.; Zhang, X.; Xu, M.; Feng, Q.S.; Chen, M.Y.; et al. Vasculogenic mimicry formation in EBV-associated epithelial malignancies. *Nat Commun* **2018**, *9*, 5009, doi:10.1038/s41467-018-07308-5.
36. Pegtel, D.M.; Subramanian, A.; Sheen, T.S.; Tsai, C.H.; Golub, T.R.; Thorley-Lawson, D.A. Epstein-Barr-virus-encoded LMP2A induces primary epithelial cell migration and invasion: possible role in nasopharyngeal carcinoma metastasis. *J Virol* **2005**, *79*, 15430–15442, doi:10.1128/JVI.79.24.15430-15442.2005.
37. Fotheringham, J.A.; Coalson, N.E.; Raab-Traub, N. Epstein-Barr virus latent membrane protein-2A induces ITAM/Syk- and Akt-dependent epithelial migration through alphav-integrin membrane translocation. *J Virol* **2012**, *86*, 10308–10320, doi:10.1128/JVI.00853-12.
38. Fotheringham, J.A.; Mazzucca, S.; Raab-Traub, N. Epstein-Barr virus latent membrane protein-2A-induced DeltaNp63alpha expression is associated with impaired epithelial-cell differentiation. *Oncogene* **2010**, *29*, 4287–4296, doi:10.1038/onc.2010.175.
39. Lee, H.M.; Lo, K.W.; Wei, W.; Tsao, S.W.; Chung, G.T.Y.; Ibrahim, M.H.; Dawson, C.W.; Murray, P.G.; Paterson, I.C.; Yap, L.F. Oncogenic S1P signalling in EBV-associated nasopharyngeal carcinoma activates AKT and promotes cell migration through S1P receptor 3. *J Pathol* **2017**, *242*, 62–72, doi:10.1002/path.4879.
40. Fukuda, M.; Longnecker, R. Latent membrane protein 2A inhibits transforming growth factor-beta 1-induced apoptosis through the phosphatidylinositol 3-kinase/Akt pathway. *J Virol* **2004**, *78*, 1697–1705, doi:10.1128/jvi.78.4.1697-1705.2004.
41. Wang, L.; Tian, W.D.; Xu, X.; Nie, B.; Lu, J.; Liu, X.; Zhang, B.; Dong, Q.; Sunwoo, J.B.; Li, G.; et al. Epstein-Barr virus nuclear antigen 1 (EBNA1) protein induction of epithelial-mesenchymal transition in nasopharyngeal carcinoma cells. *Cancer* **2014**, *120*, 363–372, doi:10.1002/cncr.28418.
42. Saridakis, V.; Sheng, Y.; Sarkari, F.; Holowaty, M.N.; Shire, K.; Nguyen, T.; Zhang, R.G.; Liao, J.; Lee, W.; Edwards, A.M.; et al. Structure of the p53 binding domain of HAUSP/USP7 bound to Epstein-Barr nuclear antigen 1 implications for EBV-mediated immortalization. *Mol. Cell* **2005**, *18*, 25–36. <https://doi.org/10.1016/j.molcel.2005.02.029>.
43. Lu, J.; Murakami, M.; Verma, S.C.; Cai, Q.; Haldar, S.; Kaul, R.; Wasik, M.A.; Middeldorp, J.; Robertson, E.S. Epstein-Barr Virus nuclear antigen 1 (EBNA1) confers resistance to apoptosis in EBV-positive B-lymphoma cells through up-regulation of survivin. *Virology* **2011**, *410*, 64–75, doi:10.1016/j.virol.2010.10.029.
44. Fan, C.; Tang, Y.; Wang, J.; Xiong, F.; Guo, C.; Wang, Y.; Xiang, B.; Zhou, M.; Li, X.; Wu, X.; et al. The emerging role of Epstein-Barr virus encoded microRNAs in nasopharyngeal carcinoma. *J Cancer* **2018**, *9*, 2852–2864, doi:10.7150/jca.25460.
45. Cai, L.; Ye, Y.; Jiang, Q.; Chen, Y.; Lyu, X.; Li, J.; Wang, S.; Liu, T.; Cai, H.; Yao, K.; et al. Epstein-Barr virus-encoded microRNA BART1 induces tumour metastasis by regulating PTEN-dependent pathways in nasopharyngeal carcinoma. *Nat Commun* **2015**, *6*, 7353; Correction in *Nat Commun* **2020**, *11*, 3437.
46. Choy, E.Y.; Siu, K.L.; Kok, K.H.; Lung, R.W.; Tsang, C.M.; To, K.F.; Kwong, D.L.; Tsao, S.W.; Jin, D.Y. An Epstein-Barr virus-encoded microRNA targets PUMA to promote host cell survival. *J Exp Med* **2008**, *205*, 2551–2560, doi:10.1084/jem.20072581.
47. Wong, T.S.; Chen, S.; Zhang, M.J.; Chan, J.Y.; Gao, W. Epstein-Barr virus-encoded microRNA BART7 downregulates major histocompatibility complex class I chain-related peptide A and reduces the cytotoxicity of natural killer cells to nasopharyngeal carcinoma. *Oncol Lett* **2018**, *16*, 2887–2892, doi:10.3892/ol.2018.9041.
48. Song, Y.; Li, X.; Zeng, Z.; Li, Q.; Gong, Z.; Liao, Q.; Li, X.; Chen, P.; Xiang, B.; Zhang, W.; et al. Epstein-Barr virus encoded miR-BART11 promotes inflammation-induced carcinogenesis by targeting FOXP1. *Oncotarget* **2016**, *7*, 36783–36799, doi:10.18632/oncotarget.9170.
49. Huang, J.; Qin, Y.; Yang, C.; Wan, C.; Dai, X.; Sun, Y.; Meng, J.; Lu, Y.; Li, Y.; Zhang, Z.; et al. Downregulation of ABI2 expression by EBV-miR-BART13-3p induces epithelial-mesenchymal transition of nasopharyngeal carcinoma cells through upregulation of c-JUN/SLUG signaling. *Aging (Albany NY)* **2020**, *12*, 340–358, doi:10.18632/aging.102618.
